# Supplementary material
Source: Elsevier journal article supplement (http://publikationen.ub.uni-frankfurt.de/opus4/files/43678/mmc1.pdf)
Supplement: mmc1 [file mmc1.pdf]

## SUPPLEMENTARY CONTENT

### **Heterogeneous regulation of bacterial natural product biosynthesis via a novel transcription factor**

Antje K. Heinrich<sup>1\*</sup>, Angela Glaeser<sup>3\*</sup>, Nicholas J. Tobias<sup>1</sup>, Ralf Heermann<sup>3,#</sup>,  
and Helge B. Bode<sup>1,2,#</sup>

<sup>1</sup>*Fachbereich Biowissenschaften, Merck Stiftungsprofessur für Molekulare  
Biotechnologie, Goethe-Universität Frankfurt, Frankfurt am Main, Germany*

<sup>2</sup>*Buchmann Institute for Molecular Life Sciences, Goethe-Universität  
Frankfurt, Frankfurt am Main, Germany*

<sup>3</sup>*Bereich Mikrobiologie, Biozentrum Martinsried, Ludwig-Maximilians-  
Universität München, München, Germany*

\*Equal contribution

#Corresponding authors

heermann@lmu.de

h.bode@bio.uni-frankfurt.de

## Supplementary Tables

**Table S1.** Bacterial strains used in this study.

| Strain                                                                                                                            | Genotype                                                                                                                                                                                                                                                                 | Reference                                                          |
|-----------------------------------------------------------------------------------------------------------------------------------|--------------------------------------------------------------------------------------------------------------------------------------------------------------------------------------------------------------------------------------------------------------------------|--------------------------------------------------------------------|
| <i>E. coli</i> DH10B                                                                                                              | F <sup>-</sup> <i>mcrA</i> $\Delta$ ( <i>mrr-hsdRMS-mcrBC</i> )<br>$\Phi$ 80 <i>lacZ</i> $\Delta$ M15 $\Delta$ <i>lacX74</i> <i>recA1</i> <i>endA1</i><br><i>araD139</i> $\Delta$ ( <i>ara leu</i> ) 7697 <i>galU</i> <i>galK</i> <i>rpsL</i><br><i>nupG</i> $\lambda$ - | [1]                                                                |
| <i>E. coli</i> Dh5 $\alpha$ $\lambda$ <i>pir</i>                                                                                  | <i>recA1</i> , <i>gyrA</i> ( <i>lacIZYA-argF</i> ) ( <i>80d lac</i><br>[ <i>lacZ</i> ] M15) <i>pir</i> RK6                                                                                                                                                               | [2]                                                                |
| <i>E. coli</i> S17-1 $\lambda$ <i>pir</i>                                                                                         | Tp <sup>R</sup> Sm <sup>R</sup> <i>recA</i> , <i>thi</i> , <i>pro</i> , <i>hsdR</i> -M+RP4: 2-<br>Tc:Mu: Km Tn7 $\lambda$ <i>pir</i>                                                                                                                                     | Biomedal S.L.,<br>Sevilla, Spain                                   |
| <i>E. coli</i> ST18                                                                                                               | <i>E. coli</i> S17 $\lambda$ <i>pir</i> $\Delta$ <i>hemA</i>                                                                                                                                                                                                             | [3]                                                                |
| <i>E. coli</i> BL21 (DE3) Star                                                                                                    | F <sup>-</sup> <i>ompT</i> <i>hsdS<sub>B</sub></i> ( <i>r<sub>B</sub><sup>-</sup></i> <i>m<sub>B</sub><sup>-</sup></i> ) <i>gal</i> <i>dcm</i> <i>rne131</i><br>(DE3)                                                                                                    | Invitrogen                                                         |
| <i>E. coli</i> LMG194                                                                                                             | F- $\Delta$ <i>lacX74</i> <i>galE</i> <i>galK</i> <i>thi</i> <i>rpsL</i> $\Delta$ <i>phoA</i><br>(Pvull) $\Delta$ <i>ara714</i> <i>leu::Tn10</i>                                                                                                                         | [4]                                                                |
| <i>P. luminescens</i> subsp.<br><i>laumondii</i> TT01-1 <sup>o</sup>                                                              | Wild type 1 <sup>o</sup> variant                                                                                                                                                                                                                                         | [5]                                                                |
| <i>P. luminescens</i> subsp.<br><i>laumondii</i> TT01-2 <sup>o</sup>                                                              | Wild type 2 <sup>o</sup> variant                                                                                                                                                                                                                                         | Lab collection, Dr.<br>David Clarke,<br>University College<br>Cork |
| <i>P. luminescens</i><br>TT01-1 <sup>o</sup> $\Delta$ <i>antJ</i>                                                                 | Wild type 1 <sup>o</sup> variant containing a deletion<br>of <i>antJ</i>                                                                                                                                                                                                 | This study                                                         |
| <i>P. luminescens</i><br>TT01-1 <sup>o</sup> $\Delta$ <i>plu0918-<br/>plu0925</i>                                                 | Wild type 1 <sup>o</sup> variant containing a deletion<br>of <i>plu0918-plu0925</i>                                                                                                                                                                                      | This study                                                         |
| <i>P. luminescens</i><br>TT01-1 <sup>o</sup> $\Delta$ <i>plu2548</i>                                                              | Wild type 1 <sup>o</sup> variant containing a deletion<br>of <i>plu2548</i>                                                                                                                                                                                              | This study                                                         |
| <i>P. luminescens</i> TT01-1 <sup>o</sup><br><i>P<sub>antA</sub>-mCherry</i>                                                      | TT01-1 <sup>o</sup> harboring <i>P<sub>antA</sub>-mCherry</i><br>reporter integrated at the <i>rpmE/glmS</i><br>site, Kan <sup>R</sup> , Gent <sup>R</sup>                                                                                                               | [6]                                                                |
| <i>P. luminescens</i> TT01-2 <sup>o</sup><br><i>P<sub>antA</sub>-mCherry</i>                                                      | TT01-2 <sup>o</sup> harboring <i>P<sub>antA</sub>-mCherry</i><br>reporter integrated at the <i>rpmE/glmS</i><br>site, Kan <sup>R</sup> , Gent <sup>R</sup>                                                                                                               | This study                                                         |
| <i>P. luminescens</i><br>TT01-1 <sup>o</sup> $\Delta$ <i>antJ</i> <i>P<sub>antA</sub>-<br/>mCherry</i>                            | TT01-1 <sup>o</sup> $\Delta$ <i>antJ</i> harboring <i>P<sub>antA</sub>-mCherry</i><br>reporter integrated at the <i>rpmE/glmS</i><br>site, Kan <sup>R</sup> , Gent <sup>R</sup>                                                                                          | This study                                                         |
| <i>P. luminescens</i> TT01-1 <sup>o</sup><br><i>P<sub>antA</sub>-mCherry</i> <i>P<sub>antJ</sub>-<br/>eYFP</i>                    | TT01-1 <sup>o</sup> harboring <i>P<sub>antA</sub>-mCherry</i> and<br><i>P<sub>antJ</sub>-eYFP</i> reporter integrated at the<br><i>rpmE/glmS</i> site, Kan <sup>R</sup> , Gent <sup>R</sup>                                                                              | This study                                                         |
| <i>P. luminescens</i> TT01-2 <sup>o</sup><br><i>P<sub>antA</sub>-mCherry</i> <i>P<sub>antJ</sub>-eyfp</i>                         | TT01-2 <sup>o</sup> harboring <i>P<sub>antA</sub>-mCherry</i> and<br><i>P<sub>antJ</sub>-eYFP</i> reporter reporter integrated at<br>the <i>rpmE/glmS</i> site, Kan <sup>R</sup> , Gent <sup>R</sup>                                                                     | This study                                                         |
| <i>P. luminescens</i> TT01-1 <sup>o</sup><br>$\Delta$ <i>antJ</i> <i>P<sub>antA</sub>-mCherry</i><br><i>P<sub>antJ</sub>-eYFP</i> | TT01-1 <sup>o</sup> $\Delta$ <i>antJ</i> harboring <i>P<sub>antA</sub>-mCherry</i><br>and <i>P<sub>antJ</sub>-eYFP</i> reporter reporter<br>integrated at the <i>rpmE/glmS</i> site, Kan <sup>R</sup> ,<br>Gent <sup>R</sup>                                             | This study                                                         |

|                                                                                                        |                                                                                                                                                                                             |            |
|--------------------------------------------------------------------------------------------------------|---------------------------------------------------------------------------------------------------------------------------------------------------------------------------------------------|------------|
| <i>P. luminescens</i> TT01-1°<br>P <sub>antA</sub> -mCherry P <sub>antJ</sub> -<br>antJ-eYFP           | TT01-1° harboring P <sub>antA</sub> -mCherry and<br>P <sub>antJ</sub> -antJ-eYFP reporter integrated at the<br><i>rpmE/glmS</i> site, Kan <sup>R</sup> , Gent <sup>R</sup>                  | This study |
| <i>P. luminescens</i> TT01-2°<br>P <sub>antA</sub> -mCherry P <sub>antJ</sub> -<br>antJ-eYFP           | TT01-2° harboring P <sub>antA</sub> -mCherry and<br>P <sub>antJ</sub> -antJ-eYFP reporter reporter<br>integrated at the <i>rpmE/glmS</i> site, Kan <sup>R</sup> ,<br>Gent <sup>R</sup>      | This study |
| <i>P. luminescens</i><br>TT01-1°ΔantJ P <sub>antA</sub> -<br>mCherry P <sub>antJ</sub> - antJ-<br>eYFP | TT01-1°ΔantJ harboring P <sub>antA</sub> -mCherry<br>and P <sub>antJ</sub> -antJ-eYFP reporter reporter<br>integrated at the <i>rpmE/glmS</i> site, Kan <sup>R</sup> ,<br>Gent <sup>R</sup> | This study |
| <i>P. luminescens</i> TT01-1°<br>P <sub>antA</sub> -mCherry P <sub>tac</sub> -antJ-<br>eYFP            | TT01-1° harboring P <sub>antA</sub> -mCherry and<br>P <sub>tac</sub> -antJ-eYFP reporter integrated at the<br><i>rpmE/glmS</i> site, Kan <sup>R</sup> , Gent <sup>R</sup>                   | This study |
| <i>P. luminescens</i> TT01-2°<br>P <sub>antA</sub> -mCherry P <sub>tac</sub> -<br>antJ-eYFP            | TT01-2° harboring P <sub>antA</sub> -mCherry and<br>P <sub>tac</sub> -antJ-eYFP reporter reporter<br>integrated at the <i>rpmE/glmS</i> site, Kan <sup>R</sup> ,<br>Gent <sup>R</sup>       | This study |
| <i>P. luminescens</i> TT01-1°<br>ΔantJ P <sub>antA</sub> -mCherry<br>P <sub>tac</sub> - antJ-eYFP      | TT01-1°ΔantJ harboring P <sub>antA</sub> -mCherry<br>and P <sub>tac</sub> -antJ-eYFP reporter reporter<br>integrated at the <i>rpmE/glmS</i> site, Kan <sup>R</sup> ,<br>Gent <sup>R</sup>  | This study |
| <i>P. luminescens</i> TT01-1°<br>P <sub>less</sub> -mCherry P <sub>less</sub> -<br>eYFP                | TT01-1°harboring P <sub>less</sub> -mCherry and<br>P <sub>less</sub> -eYFP reporter integrated at the<br><i>rpmE/glmS</i> site, Kan <sup>R</sup> , Gent <sup>R</sup>                        | This study |
| <i>P. luminescens</i> TT01-2°<br>P <sub>less</sub> -mCherry P <sub>less</sub> -<br>eYFP                | TT01-2° harboring P <sub>less</sub> -mCherry and<br>P <sub>less</sub> -eYFP reporter integrated at the<br><i>rpmE/glmS</i> site, Kan <sup>R</sup> , Gent <sup>R</sup>                       | This study |
| <i>P. luminescens</i><br>TT01-1°ΔantJ P <sub>less</sub> -<br>mCherry P <sub>less</sub> -eYFP           | TT01-1°ΔantJ harboring P <sub>less</sub> -mCherry<br>and P <sub>less</sub> -eYFP reporter integrated at<br>the <i>rpmE/glmS</i> site, Kan <sup>R</sup> , Gent <sup>R</sup>                  | This study |

**Table S2.** Plasmids used in this study.

| Plasmid             | Genotype                                                                                                                                                   | Reference                         |
|---------------------|------------------------------------------------------------------------------------------------------------------------------------------------------------|-----------------------------------|
| pJet1.2/blunt       | Cloning vector                                                                                                                                             | Thermo Scientific                 |
| pCKcipB             | pDS132 base vector , R6K ori; Cm <sup>R</sup> ; oriT; <i>sacB</i> ; relaxase <i>tral</i> , additional <i>Bgl</i> II within the <i>mcs</i>                  | [7]                               |
| pACYCDuet-1         | Expression vector, p15A ori, Cm <sup>R</sup>                                                                                                               | Merck (Darmstadt)                 |
| pCOLADuet-1         | Expression vector, ColA ori, Km <sup>R</sup>                                                                                                               | Merck (Darmstadt)                 |
| pACYC_tacl/I        | pACYC-Duet1 based vector, p15A ori, Cm <sup>R</sup> , 2 <i>mcs</i> with <i>tacl</i> promoters                                                              | [8]                               |
| pCOLA_tacl/I        | pCOLA-Duet1 based vector, ColA ori, Km <sup>R</sup> , 2 <i>mcs</i> with <i>tacl</i> promoters                                                              | [8]                               |
| pCATI4              | expression cassette inserted in pCOLADuet-1, ColA ori, Km <sup>R</sup> , His <sub>6</sub> -tag                                                             | T. Schöner, Frankfurt unpublished |
| pAKH01              | R6K ori, Cm <sup>R</sup> , oriT, <i>sacB</i> , relaxase <i>tral</i> , encoding the 926 bp upstream and the 788 bp downstream region of <i>antJ</i>         | This study                        |
| pAKH02              | R6K ori, Cm <sup>R</sup> , oriT, <i>sacB</i> , relaxase <i>tral</i> , encoding the 843 bp upstream and the 733 bp downstream region of <i>plu0918-0925</i> | This study                        |
| pAKH03              | R6K ori, Cm <sup>R</sup> , oriT, <i>sacB</i> , relaxase <i>tral</i> , encoding the 853 bp upstream and the 912 bp downstream region of <i>plu2548</i>      | This study                        |
| pAKH04              | ColA ori, Km <sup>R</sup> , <i>tacl</i> promoter, <i>antJ</i>                                                                                              | This study                        |
| pAKH05              | p15A ori, Cm <sup>R</sup> , <i>tacl</i> promoter, <i>antJ</i>                                                                                              | This study                        |
| pBAD24              | Expression vector, arabinose inducible promoter, ApR                                                                                                       | [4]                               |
| pBAD24-antJ         | <i>antJ</i> in pBAD24                                                                                                                                      | This study                        |
| pBAD24-antJ-His     | <i>antJ</i> in pBAD24 with C-terminal His-tag                                                                                                              | This study                        |
| pCATI4_antJ         | <i>antJ</i> with C-terminal His-tag in pCATI4                                                                                                              | This study                        |
| pBBR1-mcs5-tt-lux   | <i>luxCDABE</i> and terminators lambda T0 <i>rrnB1</i> T1 cloned into pBBR1-mcs5 for plasmid-based transcriptional fusions; Gm <sup>R</sup>                | [9]                               |
| pBBR1-PantA-lux     | <i>luxCDABE</i> under the control of the <i>antA</i> -promoter                                                                                             | This study                        |
| pBBR1-PantA-s1-lux  | <i>luxCDABE</i> under the control of the truncated promoter construct P <sub><i>antA</i>-S1</sub>                                                          | This study                        |
| pBBR1-PantA-s2-lux  | <i>luxCDABE</i> under the control of the truncated promoter construct P <sub><i>antA</i>-S2</sub>                                                          | This study                        |
| pBBR1-PantA-s3-lux  | <i>luxCDABE</i> under the control of the truncated promoter construct P <sub><i>antA</i>-S3</sub>                                                          | This study                        |
| pBBR1-PantA-mm1-lux | <i>luxCDABE</i> under the control of the promoter construct P <sub><i>antA</i>-mm1</sub> with an altered binding motif 1                                   | This study                        |

|                                                             |                                                                                                                                                                 |                                                  |
|-------------------------------------------------------------|-----------------------------------------------------------------------------------------------------------------------------------------------------------------|--------------------------------------------------|
| pBBR1-PantA-mm2-lux                                         | <i>luxCDABE</i> under the control of the promoter construct $P_{antA}$ -mm2 with an altered binding motif 2                                                     | This study                                       |
| pBBR1-PantA-mspacer-lux                                     | <i>luxCDABE</i> under the control of the promoter construct $P_{antA}$ -mspacer with an altered spacer region                                                   | This study                                       |
| pPINT-mCherry                                               | Km <sup>R</sup> , Gm <sup>R</sup> and <i>mCherry</i> in pPINT                                                                                                   | [6]                                              |
| pPINT- $P_{antA}$ -mCherry                                  | Km <sup>R</sup> , Gm <sup>R</sup> , <i>antA</i> -promoter upstream of <i>mCherry</i>                                                                            | [6]                                              |
| pEYFP                                                       | Ap <sup>R</sup> , <i>lac</i> -promoter upstream of <i>eYFP</i>                                                                                                  | Takara-Clonotech, Saint-Germain-en-Laye, France) |
| pPEINT-mCherry-eYFP                                         | Km <sup>R</sup> , Gm <sup>R</sup> , <i>mCherry</i> and eYFP in pPINT                                                                                            | This study                                       |
| pPEINT- $P_{antA}$ -mCherry- $P_{antJ}$ -eYFP               | Km <sup>R</sup> , Gm <sup>R</sup> , <i>antA</i> -promoter upstream of <i>mCherry</i> , <i>antJ</i> -promoter upstream of <i>eYFP</i>                            | This study                                       |
| pPEINT- $P_{antA}$ -mCherry- $P_{antJ}$ - <i>antJ</i> -eYFP | Km <sup>R</sup> , Gm <sup>R</sup> , <i>antA</i> -promoter upstream of <i>mCherry</i> , <i>antJ</i> -promoter upstream of <i>antJ</i> - <i>eYFP</i>              | This study                                       |
| pPEINT- $P_{antA}$ -mCherry- $P_{tac}$ - <i>antJ</i> -eYFP  | Km <sup>R</sup> , Gm <sup>R</sup> , <i>antA</i> -promoter upstream of <i>mCherry</i> , <i>tac</i> -promoter upstream of <i>antJ</i> - <i>eYFP</i> , <i>lacI</i> | This study                                       |
| pPEINT- $P_{antJ}$ -mCherry-Pless-eYFP                      | Km <sup>R</sup> , Gm <sup>R</sup> , <i>antJ</i> promoter upstream of <i>mCherry</i>                                                                             | This study                                       |
| pPEINT- $P_{antJ}$ - <i>antJ</i> -mCherry-Pless-eYFP        | Km <sup>R</sup> , Gm <sup>R</sup> , <i>antJ</i> promoter upstream of <i>antJ</i> - <i>mCherry</i>                                                               | This study                                       |

**Table S3.** Oligonucleotides used in this study.

| Name   | Sequence (5'-3')                                       |
|--------|--------------------------------------------------------|
| AKHp01 | [Bln]ACATTATATACCTTATGGATTTCAAGATG                     |
| AKHp02 | GAAAACCTGAAAGCTTCTATTACC                               |
| AKHp03 | [Bln]TGAAGGTAAGAGTACGTGTTTGG                           |
| AKHp04 | GGCATATTTTCATCTGAACTATTCC                              |
| AKHp05 | [Bln]GTATAGTGACATGATAAAGTGTTTTGG                       |
| AKHp06 | ATATCTGCAGTATACATCGCGATGGTAAGG                         |
| AKHp07 | ATCATTTATTTCCGAACTCCTCATTTTAATAA                       |
| AKHp08 | AGTTCGGAAATAAATGATTACGGATGAGTAATTTATG                  |
| AKHp09 | ATATGGATCCAAATGATTATTGGCAATGGAC                        |
| AKHp10 | GGCGGTAGCTATATTTGATGG                                  |
| AKHp11 | CATTTTCCGATTCACAATTAACC                                |
| AKHp12 | CAGCTTAATTAACCTAGGCTGCTG                               |
| AKHp13 | GGAATTCCTCCTGTGT                                       |
| AKHp14 | CAATTTACACAGGAGGGAATTCATGTCAAGAACCGAAAGAC              |
| AKHp15 | CAGCAGCCTAGGTTAATTAAGCTGCATCCGTAATCATTTATTTAGG         |
| AKHp16 | CCTCTAGAGTCGACCTGCAGAAATCTGGCGAATTAACCTTACC            |
| AKHp17 | AGTGGTTCATTGATCATGATTAAACTGTAAAACCTGTAA                |
| AKHp18 | TTTAATCATGATCAATGAACCACTCCGTCAC                        |
| AKHp19 | TCCCGGGAGAGCTCAGATCTTAGTATTCCGCACCAGTGC                |
| AKHp20 | ACGGGTATTTAAACATTAACAAGG                               |
| AKHp21 | CCTATGGATTTCAAGATACATCG                                |
| AKHp22 | CCTCTAGAGTCGACCTGCAGAATTTCACTGGATGTTACAG               |
| AKHp23 | GCGTAGATGAATTATATAACTTGTGGCTAAAATAATTTTC               |
| AKHp24 | CCACAAGTTATATAATTCATCTACGCGGAGAGG                      |
| AKHp25 | TCCCGGGAGAGCTCAGATCTCAAGGCACAAAATATCAAGG               |
| AKHp26 | AATACATGATAGCCAAGCTTCC                                 |
| AKHp27 | AACTGGTAAAAGAGTTTGACGG                                 |
| AKHp28 | [Cy3]TGTGTATTTAGCGGTTATCG                              |
| AKHp29 | [Cy3]TCAAACACCAATCTATCAGG                              |
| AKHp30 | TGTGTATTTAGCGGTTATCGGTATAGTGACATGATAAAGTGTTTTGG        |
| AKHp31 | TCAAACACCAATCTATCACGTTACGAAAATATTAACCTTTTCACG          |
| AKHp32 | TGTGTATTTAGCGGTTATCGACACCGATATATTATTGTTCTTTACG         |
| AKHp33 | TCAAACACCAATCTATCACGTTACCCCTAACAAGCATTATTC             |
| AKHp34 | TGTGTATTTAGCGGTTATCGATGCTGACAAAACCTGTCAC               |
| AKHp35 | TCAAACACCAATCTATCACGATCTTGAATCTATAGGGTATATATTATT<br>GC |
| AKHp36 | TGTGTATTTAGCGGTTATCGTCTGTTTTTCCGTGAATAGC               |
| AKHp37 | TCAAACACCAATCTATCACGCACATCGTTATCTATGCTACCG             |
| AKHp38 | TGTGTATTTAGCGGTTATCGTGTATCATGACGGCAAGG                 |
| AKHp39 | TCAAACACCAATCTATCACGATTTATACCCGTCATCTTTCAAG            |
| AKHp40 | TGTGTATTTAGCGGTTATCGACCGAGTGCGGCCAACAAAG               |
| AKHp41 | TCAAACACCAATCTATCACGCCTGTCGCGCCGGTAATAAAGG             |
| AKHp42 | ACTAGTCATCATCACCACCATC                                 |

|                       |                                               |
|-----------------------|-----------------------------------------------|
| AKHp43                | TGCCATGGTATATCTCCTTATTAAG                     |
| AKHp44                | TAAGGAGATATACCATGGCATCAAGAACCGAAAGACTTATCG    |
| AKHp45                | TGGTGGTGATGATGACTAGTGGATAAATTATTATCAGACAATCCC |
| antJ-NheI_fwd         | GCGGCTAGCAGGAGGAATTCATGTCAAGAACCGAAAGA        |
| antJ-ostop-NdeI_rev   | GCGCATATGGGATAAATTATTATCAGACAA                |
| antJ-NdeI_rev         | GCGCATATGGGATAAATTATTATCAGACAA                |
| pBAD24-Seq_fwd        | GCCGTCCTGCGTCTTTTACTGG                        |
| pBAD24-Seq_rev        | CGCTACGGCGTTTCACTTCTG                         |
| PantA-XbaI_fwd        | GCGTCTAGATAATGCAGAAATTATTGCT                  |
| Pant-XmaI_rev         | GCGCCCGGGCTGAACTATTCCTATCGTTA                 |
| PantA-s1-XbaI_fwd     | GCGTCTAGACGTAAATGCTGACAAAACT                  |
| PantA-s2_fwd          | GCGTCTAGATTTTCGTAAGACAAAACTGCTACTAATT         |
| PantA-s3-XbaI_fwd     | GCGTCTAGAATGCTTGTAGGGGTAATC                   |
| PantA-mm1-ol_fwd      | TTTCGTAACGTAGGACAAAACTGT                      |
| PantA-mm1-ol_rev      | ACAGTTTTTGTCTACGTTACGAAA                      |
| PantA-mm2_fwd         | TTATGAATACGTAGTGTAGGGGTAAT                    |
| PantA-mm2_rev         | ATTACCCCTAACACTACGTATTCATAA                   |
| PantA-spacer-ol_rev   | TGTCCTGCGGGTGAAGCATTACGAAAAA                  |
| PantA-spacer-ol_fwd   | TCACCCCGAGTGACAGCCGGCGTCCGAATGCTTGTAGGGGTA    |
| check-pBBR_fwd        | GGAGCTTGCGGCCCGGACG                           |
| check-pBBR_rev        | GTCATATTTGCCCTCCTGG                           |
| PantA-Btn_fwd         | (Btn)TAATGCAGAAATTATTGCT                      |
| eyfp-mcs_fwd          | GCTGGGCCCGAGCTCGCGGCCCGCCACCATGGTGAGCAAG      |
| eyfp-EcoRI_rev        | GCTGAATTCTTACTTGTACAGCTCGTCC                  |
| PantJ-NheI_fwd        | GCTGCTAGCTGATAAGTTATCTTGTGA                   |
| Ptac-antJ-NheI_fwd    | GCTGCTAGCCATTAATTGCGTTGCGCTCA                 |
| PantJ-NotI_rev        | GCTGCGGCCGCTTCCGAACCTCCTATTTTA                |
| antJ-ostop-NcoI_rev   | GCTCCATGGAGGATAAATTATTATCAGACA                |
| check-eyfp2_rev       | GTTTGGATGGATATCTGGT                           |
| check-mcherry-ins_rev | GGCCTTCTTCTCCTTCAC                            |
| PantA-NheI_fwd        | GCTGCTAGCTAATGCAGAAATTATTGCT                  |
| PantA-NheI_rev        | GCGGCTAGCCTGAACTATTCCTATCGTTA                 |
| PantJ-BamHI_rev       | GCGGGATCCTTCCGAACCTCCTATTTTA                  |
| antJ-ostop-           | GCGGGATCCGGATAAATTATTATCAGACA                 |

|                |                                        |
|----------------|----------------------------------------|
| BamHI_rev      |                                        |
| check-eyfp_rev | CTGCAGGCCGTAGCCGAA                     |
| check-rpmE_fwd | CTCCCAAATAAAGTTTAGG                    |
| check-glmS_rev | GTACGTGAATCTGATTTTG                    |
| oriT_fwd       | CAGGGTTATGCAGCGGAAA                    |
| gmR-pNPTS_fwd  | GATAAGCTGTCAAACATGAGAGTAGCGTATGCGCTCAC |

[Bln]: 5' - biotinylation, [Cy3]: 5' -Cy3-label



**Table S4:** Summary of differently expressed (mRNA) transcripts (sense direction) in the TT01-1° $\Delta antJ$  strain. Listed are the fold changes in read counts of TT01-1° $\Delta antJ$ , TT01-1° $\Delta antJ$  +  $antJ^+$  and TT01-1° + control1 compared to TT01-1°. The false discovery rate (FDR) is < 0.01. For clarity fold changes < 1 are represented as  $-(\text{fold change})^{-1}$ . The functions of genes without a given gene name were domain guided annotated using the NCBI tools: protein blast and conserved domain search.

| Locus tag      | Gene         | Putative function of the gene product                                 | Fold change in read counts compared to the WT |                                        |                       |
|----------------|--------------|-----------------------------------------------------------------------|-----------------------------------------------|----------------------------------------|-----------------------|
|                |              |                                                                       | TT01-1°<br>$\Delta antJ$                      | TT01-1°<br>$\Delta antJ$ +<br>$antJ^+$ | TT01-1°<br>+ control1 |
| <i>plu0033</i> |              | tail assembly protein                                                 | -5.03                                         | -2.21                                  | -1.47                 |
| <i>plu0034</i> |              | similarities with alternative tail fiber protein                      | -7.58                                         | -2.72                                  | -1.66                 |
| <i>plu0947</i> |              | antibiotic biosynthesis monooxygenase                                 | -9.73                                         | -2.86                                  | -1.61                 |
| <i>plu0948</i> |              | transcriptional regulator (MarR family)                               | -7.47                                         | -1.37                                  | 1.42                  |
| <i>plu0965</i> | <i>tcdA4</i> | Insecticidal toxin complex protein                                    | -1.97                                         | 1.48                                   | 1.60                  |
| <i>plu1846</i> |              | similarities with Mg(2+) transport ATPase B                           | -7.16                                         | -3.41                                  | 1.38                  |
| <i>plu3033</i> |              | hypothetical protein, similarities with unknown bacteriophage protein | -1.90                                         | 1.34                                   | 1.96                  |
| <i>plu4185</i> | <i>antJ</i>  | transcriptional regulator                                             | -358.06                                       | -17.68                                 | -1.42                 |
| <i>plu4186</i> | <i>antI</i>  | hydrolase/peptidase                                                   | -144.45                                       | -6.69                                  | -1.73                 |
| <i>plu4187</i> | <i>antH</i>  | cyclase/aromatase                                                     | -155.11                                       | -6.39                                  | -1.53                 |
| <i>plu4188</i> | <i>antG</i>  | CoA ligase                                                            | -195.13                                       | -9.75                                  | -2.39                 |
| <i>plu4189</i> | <i>antF</i>  | acyl carrier protein                                                  | -162.49                                       | -9.99                                  | -2.38                 |
| <i>plu4190</i> | <i>antE</i>  | ketosynthase KS $\beta$                                               | -96.88                                        | -7.28                                  | -1.98                 |
| <i>plu4191</i> | <i>antD</i>  | ketosynthase KS $\alpha$                                              | -193.06                                       | -8.45                                  | -2.08                 |
| <i>plu4192</i> | <i>antC</i>  | cyclase                                                               | -161.69                                       | -6.38                                  | -1.55                 |
| <i>plu4193</i> | <i>antB</i>  | PPTase                                                                | -101.93                                       | -6.17                                  | -1.43                 |
| <i>plu4194</i> | <i>antA</i>  | ketoreductase                                                         | -71.71                                        | -4.96                                  | -1.19                 |
| <i>plu4207</i> |              | unknown                                                               | -2.55                                         | -1.35                                  | 1.27                  |
| <i>plu4275</i> |              | similarities with Rhs-family protein of <i>Photorhabdus</i>           | -8.30                                         | -1.14                                  | 2.34                  |
| <i>plu4603</i> |              | unknown protein, zinc peptidase like domain                           | -1.53                                         | -3.17                                  | -2.39                 |

|                |             |                                                                          |      |       |       |
|----------------|-------------|--------------------------------------------------------------------------|------|-------|-------|
| <i>plu0452</i> |             | UDP-D-galactose:(glucosyl)lipopolysaccharide-1,6-D-galactosyltransferase | 3.06 | 1.88  | 1.79  |
| <i>plu0939</i> | <i>mltD</i> | membrane-bound lytic murein transglycosylase D                           | 2.32 | 2.94  | 2.11  |
| <i>plu1432</i> | <i>sucC</i> | succinyl-CoA ligase [ADP-forming] subunit beta                           | 2.56 | 1.14  | -1.24 |
| <i>plu1433</i> | <i>sucD</i> | succinyl-CoA synthetase subunit alpha                                    | 2.08 | 1.01  | -1.36 |
| <i>plu1653</i> |             | ATPase AAA                                                               | 3.17 | -1.30 | 1.56  |
| <i>plu1895</i> | <i>flhB</i> | flagellar biosynthesis protein FlhB                                      | 1.93 | 1.67  | -1.60 |
| <i>plu1917</i> | <i>flgD</i> | flagellar basal body rod modification protein FlgD                       | 2.95 | -1.06 | -2.35 |
| <i>plu1920</i> | <i>flgG</i> | flagellar basal body rod protein FlgG                                    | 1.85 | -1.26 | -1.82 |
| <i>plu1937</i> | <i>fliQ</i> | flagellar biosynthesis protein FliQ                                      | 2.39 | 1.26  | -1.42 |
| <i>plu1944</i> | <i>fliJ</i> | flagellar biosynthesis chaperone                                         | 1.71 | -1.01 | -2.33 |
| <i>plu1947</i> | <i>fliG</i> | flagellar motor switch protein FliG                                      | 2.46 | 1.11  | -2.05 |
| <i>plu1948</i> | <i>fliF</i> | flagellar M-ring protein FliF                                            | 1.50 | -1.42 | -2.47 |
| <i>plu2066</i> | <i>prsA</i> | ribose-phosphate pyrophosphokinase                                       | 3.06 | 2.78  | 2.04  |
| <i>plu2759</i> | <i>upp</i>  | uracil phosphoribosyltransferase                                         | 3.58 | 2.43  | 1.64  |
| <i>plu2966</i> |             | GHMP kinase                                                              | 3.60 | 1.08  | 1.36  |
| <i>plu3071</i> | <i>menB</i> | naphthoate synthase                                                      | 2.86 | -1.02 | 1.14  |
| <i>plu3072</i> |             | acyl-CoA thioester hydrolase                                             | 3.72 | 1.29  | 1.38  |
| <i>plu3519</i> |             | TonB-dependent receptor                                                  | 3.40 | 1.67  | 1.65  |
| <i>plu4125</i> | <i>frdB</i> | fumarate reductase iron-sulfur subunit                                   | 4.93 | 1.18  | 1.20  |
| <i>plu4126</i> | <i>frdC</i> | fumarate reductase subunit C                                             | 5.06 | 1.06  | 1.25  |
| <i>plu4127</i> | <i>frdD</i> | fumarate reductase subunit D                                             | 4.06 | -1.02 | 1.39  |
| <i>plu4179</i> |             | similar to the phenylacetyl-CoA ligase                                   | 2.86 | 1.37  | 1.37  |
| <i>plu4180</i> |             | similarities with fatty-acyl-CoA reductase                               | 2.94 | 1.43  | 1.36  |
| <i>plu4875</i> |             | unknown                                                                  | 4.60 | 3.19  | 2.36  |

**Table S5.** Sequences of AntJ homologous used for the phylogenetic tree (Fig. 3). The 100 most similar protein sequences of AntJ were identified performing a BLASTp search against the non-redundant protein database from NCBI. Three protein sequences were removed during alignment due to the occurrence of unusual amino acids. Color code according to Fig. 3.

|    | Accession number | Organism                                                    |
|----|------------------|-------------------------------------------------------------|
| 1  | WP_011148289.1   | <i>Photorhabdus luminescens</i>                             |
| 2  | WP_049584493.1   | <i>Photorhabdus luminescens</i>                             |
| 3  | WP_046396657.1   | <i>Photorhabdus luminescens</i>                             |
| 4  | WP_036779575.1   | <i>Photorhabdus luminescens</i>                             |
| 5  | WP_036809535.1   | <i>Photorhabdus luminescens</i>                             |
| 6  | WP_036840782.1   | <i>Photorhabdus temperata</i>                               |
| 7  | WP_046975017.1   | <i>Photorhabdus temperata</i>                               |
| 8  | WP_023044675.1   | <i>Photorhabdus temperata</i>                               |
| 9  | WP_036844635.1   | <i>Photorhabdus temperata</i>                               |
| 10 | WP_021325348.1   | <i>Photorhabdus temperata</i>                               |
| 11 | WP_050110341.1   | <i>Yersinia frederiksenii</i>                               |
| 12 | WP_050123281.1   | <i>Yersinia frederiksenii</i>                               |
| 13 | WP_060839247.1   | <i>Pseudomonas sp. Os17</i>                                 |
| 14 | WP_050150631.1   | <i>Yersinia frederiksenii]</i>                              |
| 15 | WP_050288494.1   | <i>Yersinia intermedia</i>                                  |
| 16 | WP_050312930.1   | <i>Yersinia intermedia</i>                                  |
| 17 | WP_058508488.1   | <i>Legionella quinlivanii</i>                               |
| 18 | WP_050300205.1   | <i>Yersinia frederiksenii</i>                               |
| 19 | WP_050072615.1   | <i>Yersinia intermedia</i>                                  |
| 20 | WP_050086694.1   | <i>Yersinia intermedia</i>                                  |
| 21 | WP_004709821.1   | <i>Yersinia frederiksenii</i>                               |
| 22 | WP_005190475.1   | <i>Yersinia intermedia</i>                                  |
| 23 | WP_050088562.1   | <i>Yersinia intermedia</i>                                  |
| 24 | WP_050134334.1   | <i>Yersinia frederiksenii</i>                               |
| 25 | WP_029532402.1   | <i>Pseudomonas fuscovaginae</i>                             |
| 26 | WP_029529806.1   | <i>Pseudomonas fuscovaginae</i>                             |
| 27 | WP_042569033.1   | <i>Yersinia intermedia</i>                                  |
| 28 | WP_055049039.1   | <i>Devosia sp. A16</i>                                      |
| 29 | KQW81476.1       | <i>Devosia sp. Root413D1</i>                                |
| 30 | WP_029379597.1   | <i>Pseudomonas fuscovaginae</i>                             |
| 31 | CQJ00814.1       | <i>Yersinia frederiksenii</i>                               |
| 32 | WP_026869783.1   | <i>Inquilinus limosus</i>                                   |
| 33 | WP_050100727.1   | <i>Yersinia frederiksenii</i>                               |
| 34 | WP_058442295.1   | <i>Legionella brunensis</i>                                 |
| 35 | WP_054207937.1   | <i>Bosea vaviloviae</i>                                     |
| 36 | WP_054428629.1   | <i>Achromobacter sp.</i>                                    |
| 37 | WP_058453455.1   | <i>Legionella maceachernii</i>                              |
| 38 | AMG38978.1       | <i>Achromobacter xylosoxidans</i>                           |
| 39 | WP_054620886.1   | <i>Rhodocyclaceae bacterium Paddy-1</i>                     |
| 40 | WP_054473566.1   | <i>Achromobacter sp.</i>                                    |
| 41 | WP_054415390.1   | <i>Achromobacter sp.</i>                                    |
| 42 | WP_059272440.1   | <i>Achromobacter denitrificans</i>                          |
| 43 | WP_048916042.1   | bacteria symbiont BFo1 of <i>Frankliniella occidentalis</i> |

|    |                |                                                          |
|----|----------------|----------------------------------------------------------|
| 44 | WP_054500924.1 | <i>Achromobacter</i> sp.                                 |
| 45 | AMH07354.1     | <i>Achromobacter xylosoxidans</i>                        |
| 46 | WP_054516302.1 | <i>Achromobacter</i> sp.                                 |
| 47 | WP_049052979.1 | <i>Achromobacter xylosoxidans</i>                        |
| 48 | KTL21240.1     | <i>Achromobacter xylosoxidans</i>                        |
| 49 | AKP91749.1     | <i>Achromobacter xylosoxidans</i>                        |
| 50 | WP_054497376.1 | <i>Achromobacter</i> sp.                                 |
| 51 | CCH07268.1     | <i>Achromobacter xylosoxidans</i> NH44784-1996           |
| 52 | EFV85021.1     | <i>Achromobacter xylosoxidans</i> C54                    |
| 53 | WP_010653684.1 | <i>Fluoribacter dumoffii</i>                             |
| 54 | AHC49505.1     | <i>Achromobacter xylosoxidans</i> NBRC 15126 = ATCC 2706 |
| 55 | WP_028499155.1 | <i>Microvirgula aerodenitrificans</i>                    |
| 56 | WP_014088479.1 | <i>Pseudogulbenkiania</i> sp. NH8B                       |
| 57 | WP_043544496.1 | <i>Achromobacter</i> sp. RTa                             |
| 58 | WP_054451644.1 | <i>Achromobacter</i> sp.                                 |
| 59 | WP_028534409.1 | <i>Paludibacterium yongneupense</i>                      |
| 60 | WP_058484690.1 | <i>Legionella spiritensis</i>                            |
| 61 | WP_057621642.1 | <i>Yersinia intermedia</i>                               |
| 62 | WP_052899956.1 | <i>Erwinia iniecta</i>                                   |
| 63 | IKTD24458.1    | transcriptional regulator                                |
| 64 | WP_028389016.1 | <i>Legionella fairfieldensis</i>                         |
| 65 | WP_058533473.1 | <i>Legionella</i> sp. LH-SWC                             |
| 66 | WP_058494517.1 | <i>Legionella drozanskii</i>                             |
| 67 | WP_027229983.1 | <i>Phyllobacterium</i> sp. UNC302MFCol5.2                |
| 68 | WP_043874715.1 | <i>Legionella massiliensis</i>                           |
| 69 | WP_007873521.1 | <i>Ochrobactrum</i> sp. CDB2                             |
| 70 | WP_058518397.1 | <i>Legionella parisiensis</i>                            |
| 71 | WP_058480908.1 | <i>Legionella waltersii</i>                              |
| 72 | WP_045106282.1 | <i>Legionella hackeliae</i>                              |
| 73 | WP_025139317.1 | <i>Achromobacter</i> sp. DH1f                            |
| 74 | WP_041598534.1 | <i>Hahella chejuensis</i>                                |
| 75 | WP_058504736.1 | <i>Legionella nautarum</i>                               |
| 76 | WP_045100612.1 | <i>Tatlockia micdadei</i>                                |
| 77 | WP_028385860.1 | <i>Legionella geestiana</i>                              |
| 78 | WP_028383162.1 | <i>Legionella moravica</i>                               |
| 79 | WP_058477667.1 | <i>Legionella steigerwaltii</i>                          |
| 80 | ABC28854.1     | <i>Hahella chejuensis</i> KCTC 2396                      |
| 81 | WP_058474414.1 | <i>Legionella quateirensis</i>                           |
| 82 | KTD77777.1     | <i>Legionella steigerwaltii</i>                          |
| 83 | WP_058528406.1 | <i>Legionella londiniensis</i>                           |
| 84 | WP_023492778.1 | <i>Serratia</i> sp. DD3                                  |
| 85 | IAFE61046.1    | <i>Rahnella aquatilis</i> HX2                            |
| 86 | WP_025385387.1 | <i>Legionella oakridgensis</i>                           |
| 87 | WP_058520358.1 | <i>Legionella tucsonensis</i>                            |
| 88 | CZQ79410.1     | <i>Legionella pneumophila</i>                            |
| 89 | WP_058472568.1 | <i>Legionella quateirensis</i>                           |
| 90 | WP_058459950.1 | <i>Fluoribacter bozemanai</i>                            |
| 91 | KEY57896.1     | <i>Serratia</i> sp. DD3                                  |
| 92 | KTD02388.1     | <i>Legionella geestiana</i>                              |
| 93 | WP_019232362.1 | <i>Legionella anisa</i>                                  |

|    |                |                                   |
|----|----------------|-----------------------------------|
| 94 | WP_058450353.1 | <i>Legionella jamestowniensis</i> |
| 95 | CEG60659.1     | <i>Tatlockia micdadei</i>         |
| 96 | WP_061468572.1 | <i>Legionella pneumophila</i>     |
| 97 | WP_034468061.1 | <i>Afipia</i> sp. P52-10          |

---

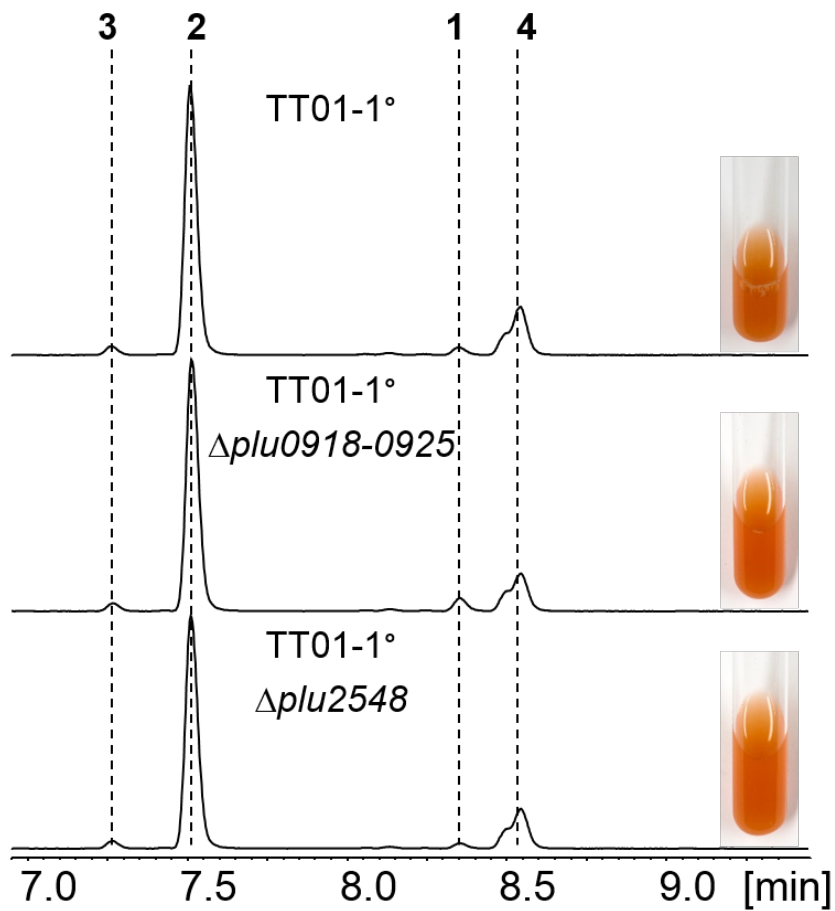

**Figure S1: Deletion of *plu2548* or *plu0919* does not influence AQ (1-4) production of *P. luminescens*.** Comparison of AQ production of TT01-1°, TT01-1°Δ*plu2548* and TT01-1°Δ*plu0918-plu0925*. HPLC-UV analysis (UV-chromatograms (430 nm)) of the EE extracts after cultivation for 24 h in LB broth. Plu0919 is encoded within a cluster of highly homologous PAS4-LuxR regulators [10]. For that reason the complete cluster *plu0918-plu0925* was deleted.

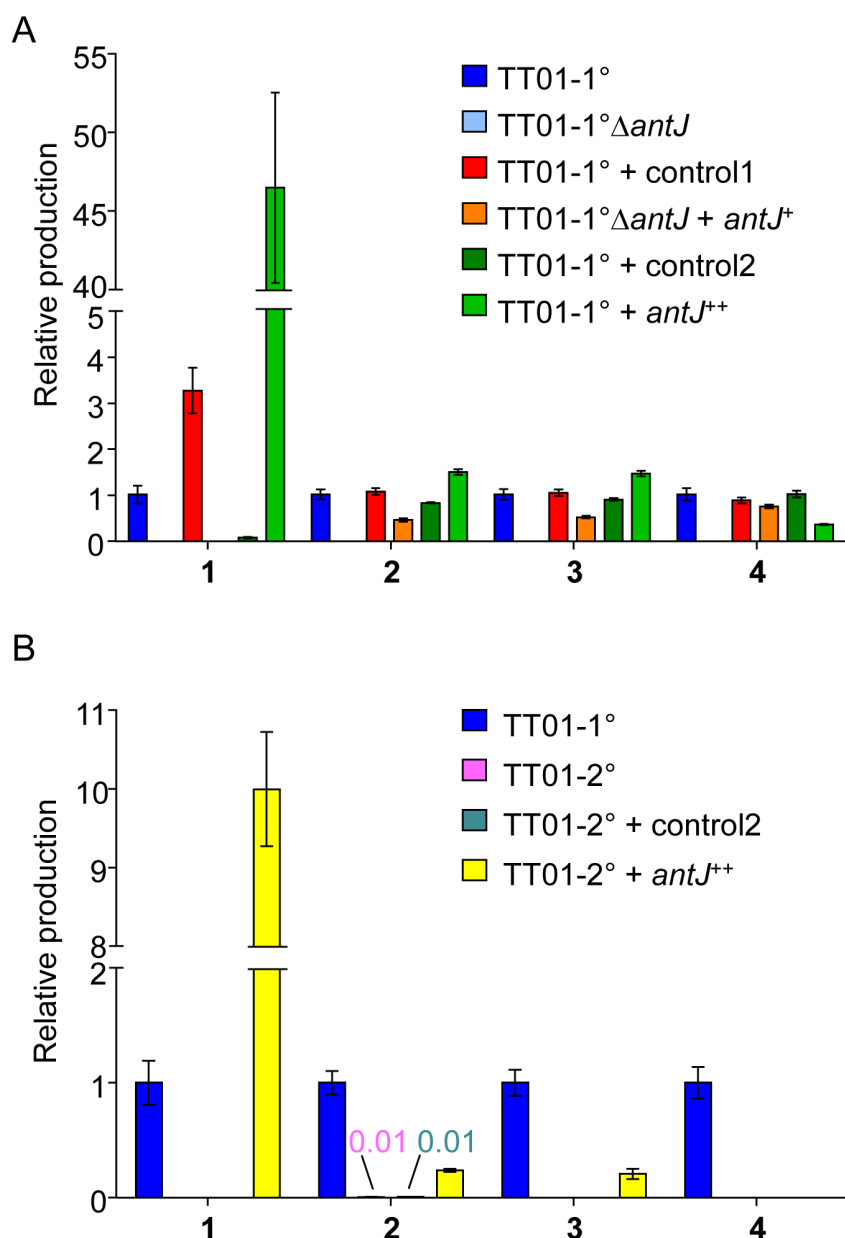

**Figure S2: Quantification of AQ (1-4) production in TT01-1°, TT01-1° $\Delta antJ$  and TT01-2°.**

**A** Comparison of AQ production of TT01-1° and TT01-1° $\Delta antJ$  cells. **B** Comparison of AQ production of TT01-1° and TT01-2° cells. EE-extracts after 24 h of cultivation in LB broth at 30°C were measured with HPLC-UV. For AQ quantification peak areas of the HPLC-UV analysis (UV-chromatograms at 430 nm) were used. The respective peak areas were normalized with the cell density ( $OD_{600}$ ) when cultures were harvested and are given relative to the production of TT01-1° of the respective compound. Extracts were prepared as triplicates. Dark blue: TT01-1°, light blue: TT01-1° $\Delta antJ$ , red: TT01-1° + control1 (pCOLA\_tacI/l), orange: TT01-1° $\Delta antJ$  +  $antJ^+$  (pAKH04), dark green: TT01-1° + control2 (pACYC\_tacI/l), light green: TT01-1° +  $antJ^{++}$  (pAKH05), pink: TT01-2°, petrol: TT01-2° + control2 (pACYC\_tacI/l), yellow: TT01-2° +  $antJ^{++}$  (pAKH05).

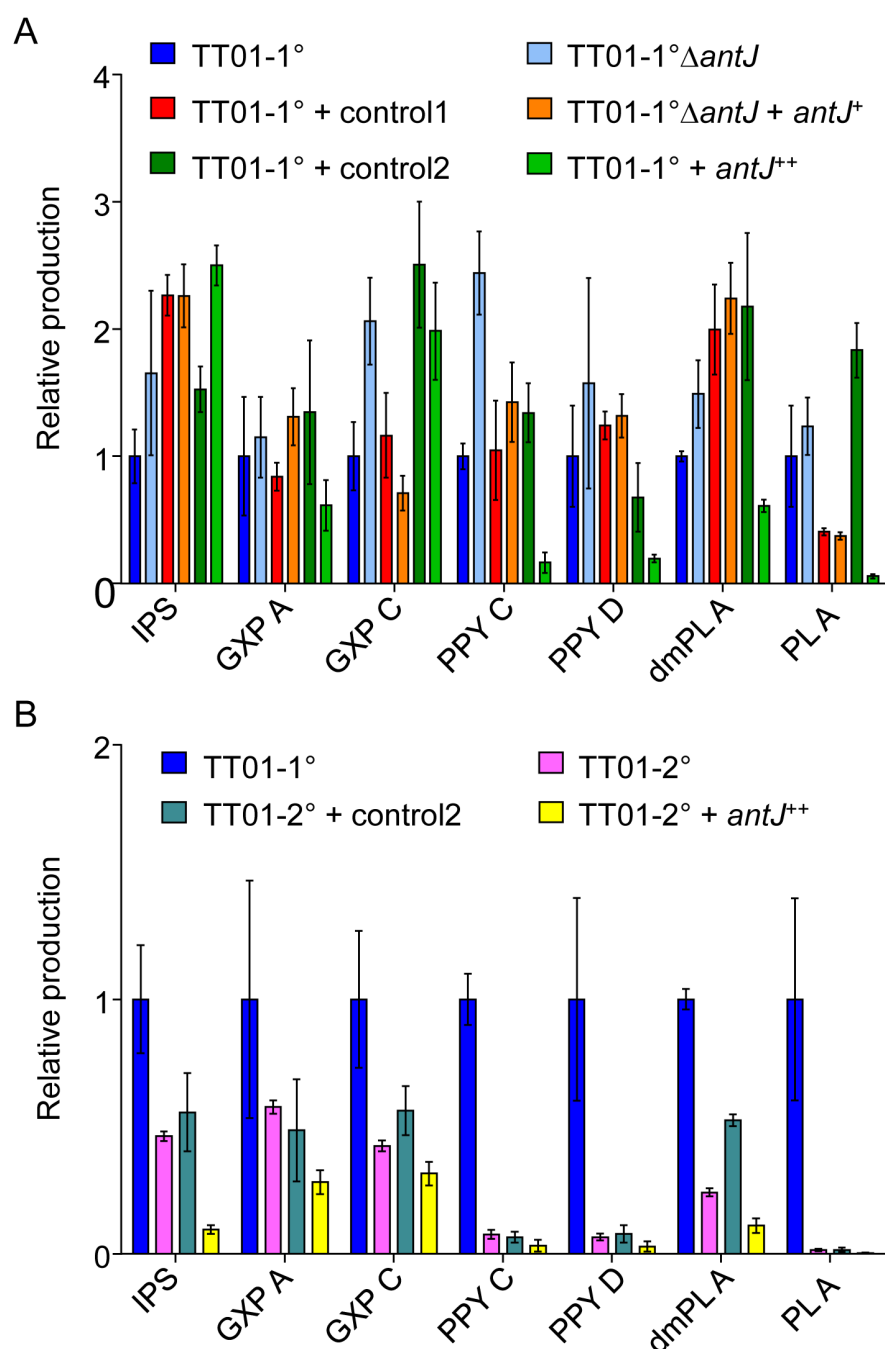

**Figure S3: Quantification of secondary metabolite production in TT01-1°, TT01-1° $\Delta antJ$  and TT01-2°.** **A** Comparison of secondary metabolite production of TT01-1° and TT01-1° $\Delta antJ$  cells. **B** Comparison of secondary metabolite production of TT01-1° and TT01-2° cells. For experimental details see Fig. S2. The secondary metabolite peak areas of the HPLC-MS analysis were determined using Bruker Compass TargetAnalysis Version 1.3. IPS: isopropylstilben; GXP A/C: GameXPeptide A/C; PPY C/D: photopyrone C/D; dmPLA: desmethyl phurealipid A; PLA A: phurealipid A. In  $\Delta antJ$  cells PPY C and GXP C were slightly upregulated. The complemented strain  $\Delta antJ$  + *antJ*<sup>+</sup> showed a very similar production compared to the corresponding wild type with the empty vector. The *antJ* overexpressing strain produced slightly more IPS but less PPYs and PLA.



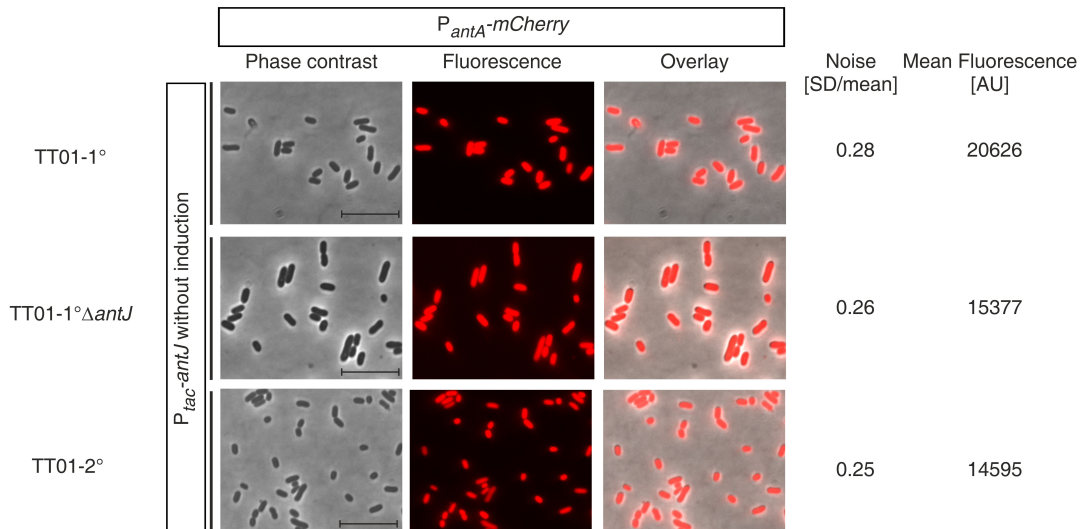

**Figure S4: Single-Cell microscopy imaging of *P. luminescens* TT01-1°, TT01-1° $\Delta antJ$  and TT01-2° cells with chromosomally integrated  $P_{antA}\text{-}mCherry$  and  $P_{tac}\text{-}antJ$  without induction.** The bars in the phase contrast pictures indicate a scale of 10  $\mu\text{m}$ . The fluorescence intensities of 450 single cells were individually measured for each experiment and analyzed using the software Big Cell Brother [11]. The noise values were calculated as SD/mean from 450 cells. Representative images and values from one of three independently performed experiments are shown. AU: Arbitrary Units

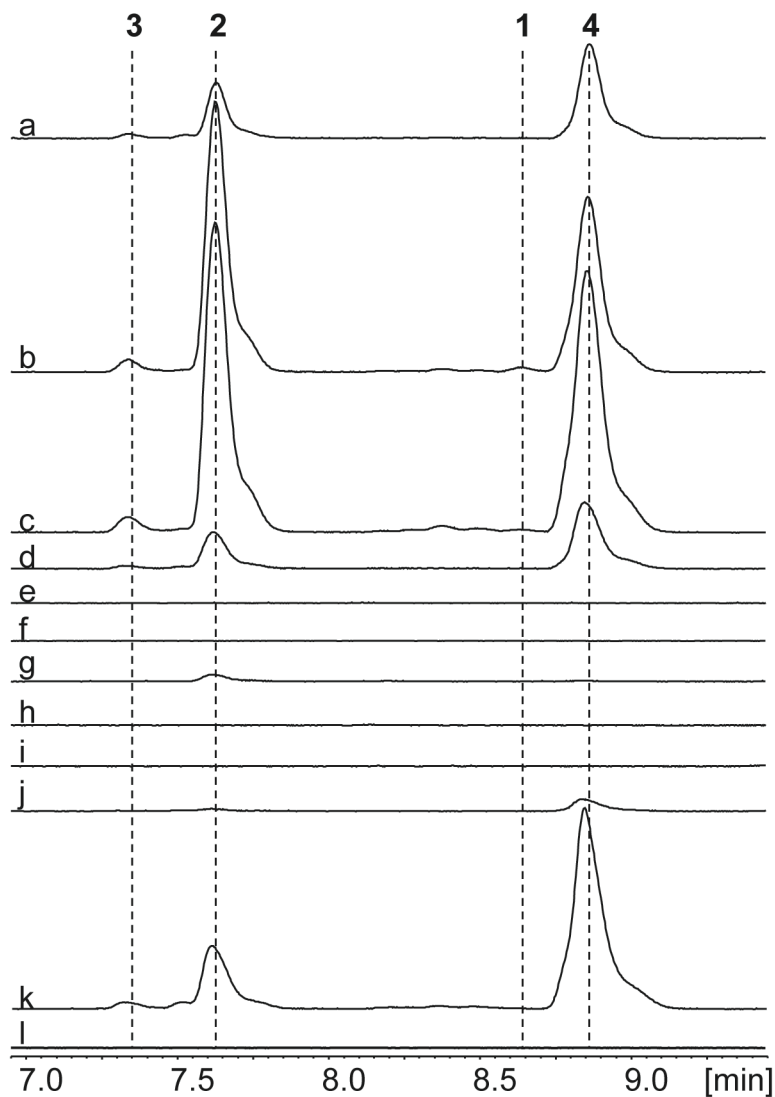

**Figure S5: Comparison of AQ production of the strains for measuring the promoter activity of *antABCDEFHI* at the single cell level.** HPLC-UV analysis (UV-chromatograms (430 nm)) of the EE extracts after cultivation for 24 h in LB at 30°C and 200 rpm. a: TT01-1°  $P_{antJ}$ , b: TT01-1°  $P_{antJ-antJ}$ , c: TT01-1°  $P_{tac-antJ}$ , d: TT01-1°  $P_{less}$ , e: TT01-2°  $P_{antJ}$ , f: TT01-2°  $P_{antJ-antJ}$ , g: TT01-2°  $P_{tac-antJ}$ , h: TT01-2°  $P_{less}$ , i: TT01-1°  $\Delta antJ$   $P_{antJ}$ , j: TT01-1°  $\Delta antJ$   $P_{antJ-antJ}$ , k: TT01-1°  $\Delta antJ$   $P_{tac-antJ}$ , l: TT01-1°  $\Delta antJ$   $P_{less}$ . All strains harbor  $P_{antA-mCherry}$  integrated at the *rpmE/glmS* site. A negative control without a promoter upstream of *mCherry* serves as negative control.

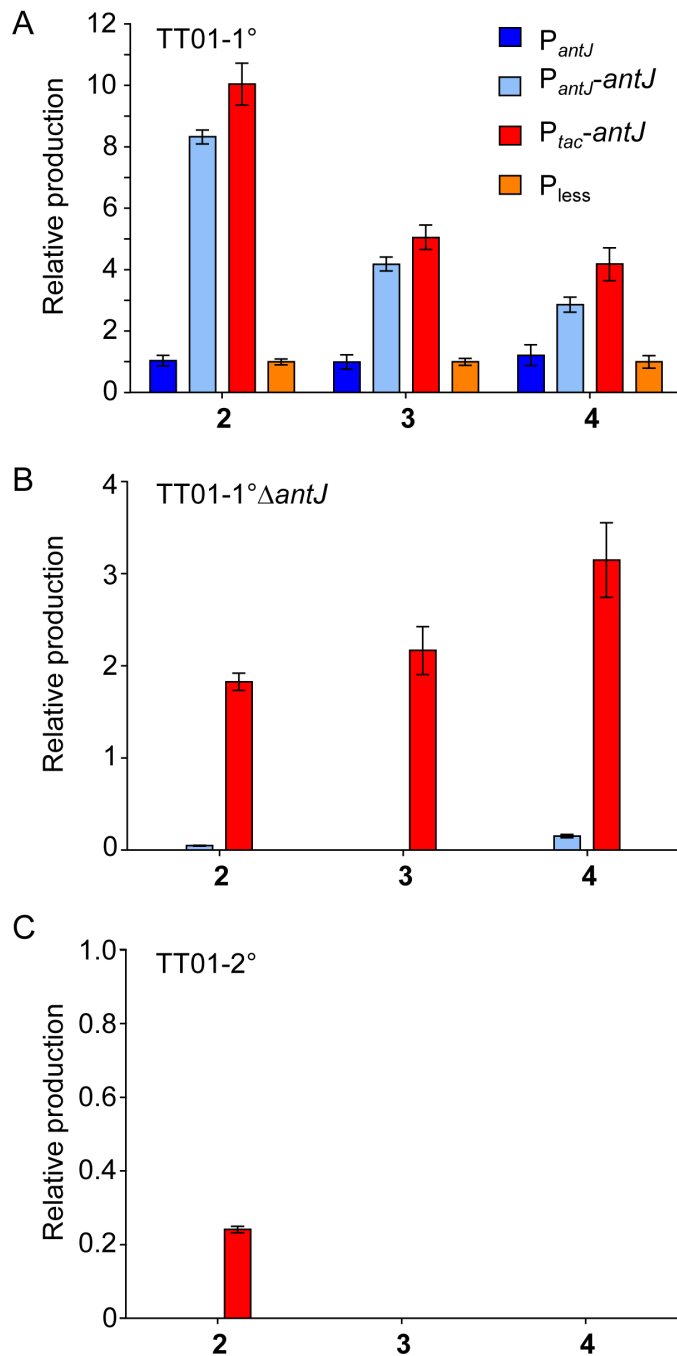

**Figure S6: Quantification of the AQ production in *P. luminescens* TT01-1°, TT01-1° $\Delta antJ$  and TT01-2° strains with chromosomally integrated  $P_{antA}$ -*mCherry* reporter gene fusion and different levels of AntJ. A** TT01-1° strains **B** TT01-1° $\Delta antJ$  strains **C** TT01-2° strains. EE-extracts after 24 h of cultivation in LB broth at 30°C were measured with HPLC-UV. For AQ quantification peak areas of the HPLC-UV analysis (UV-chromatograms at 430 nm) were used. The respective peak areas were normalized with the cell density ( $OD_{600}$ ) when cultures were harvested and are given relative to the TT01-1°  $P_{less}$ -*mCherry* production of the respective AQ. Extracts were prepared as triplicates. All strains harbor  $P_{antA}$ -*mCherry* integrated at the *rpmE/glmS* site. A negative control without a promoter upstream of *mCherry* ( $P_{less}$ ) serves as control.

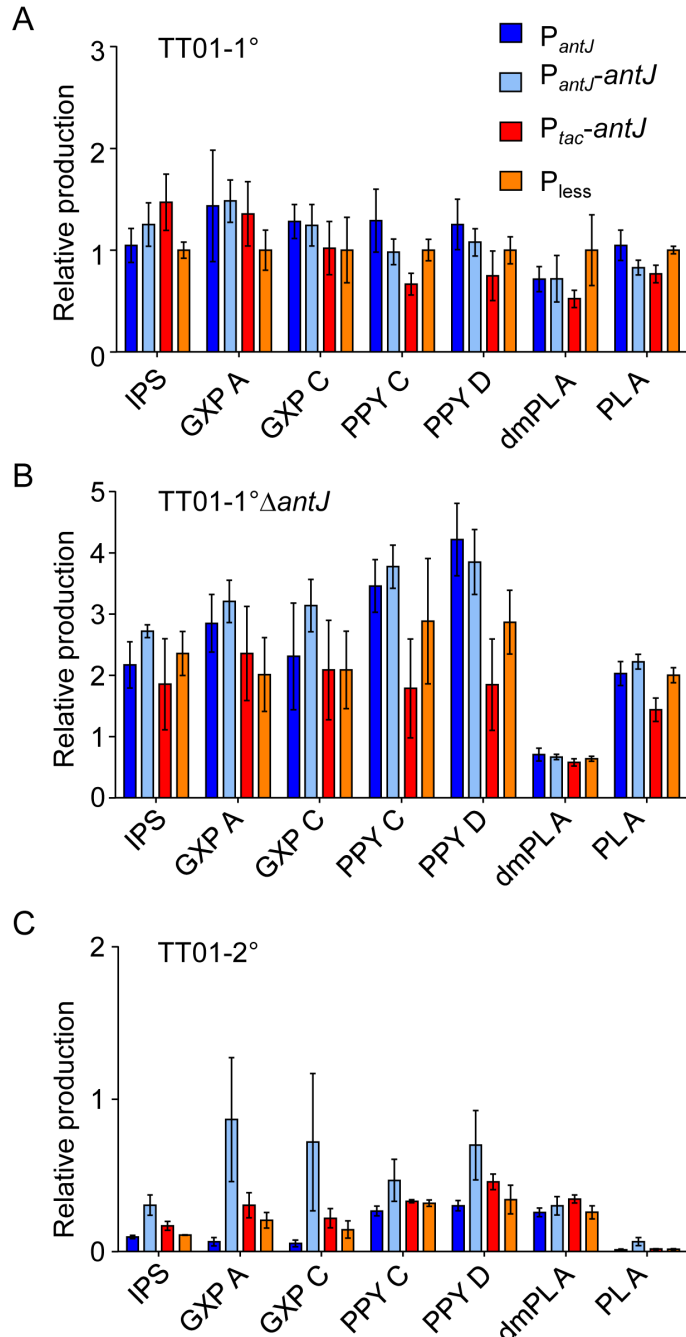

**Figure S7: Quantification of the AQ production in *P. luminescens* TT01-1°, TT01-1° $\Delta antJ$  and TT01-2° strains with chromosomally integrated  $P_{antA}$ -*mCherry* reporter gene fusion and different levels of AntJ. A TT01-1° strains B TT01-1° $\Delta antJ$  strains C TT01-2° strains. For experimental details see Fig. S6. The secondary metabolites peak areas of the HPLC-MS analysis were determined using Bruker Compass TargetAnalysis Version 1.3. Secondary metabolite production is given relative to the TT01-1°  $P_{less}$ -*mCherry* production of the respective compound. IPS: isopropylstilben; GXP A/C: GameXPeptide A/C; PPY C/D: photopyrone C/D; dmPL A: desmethyl phurealipid A; PLA A: phurealipid A.**

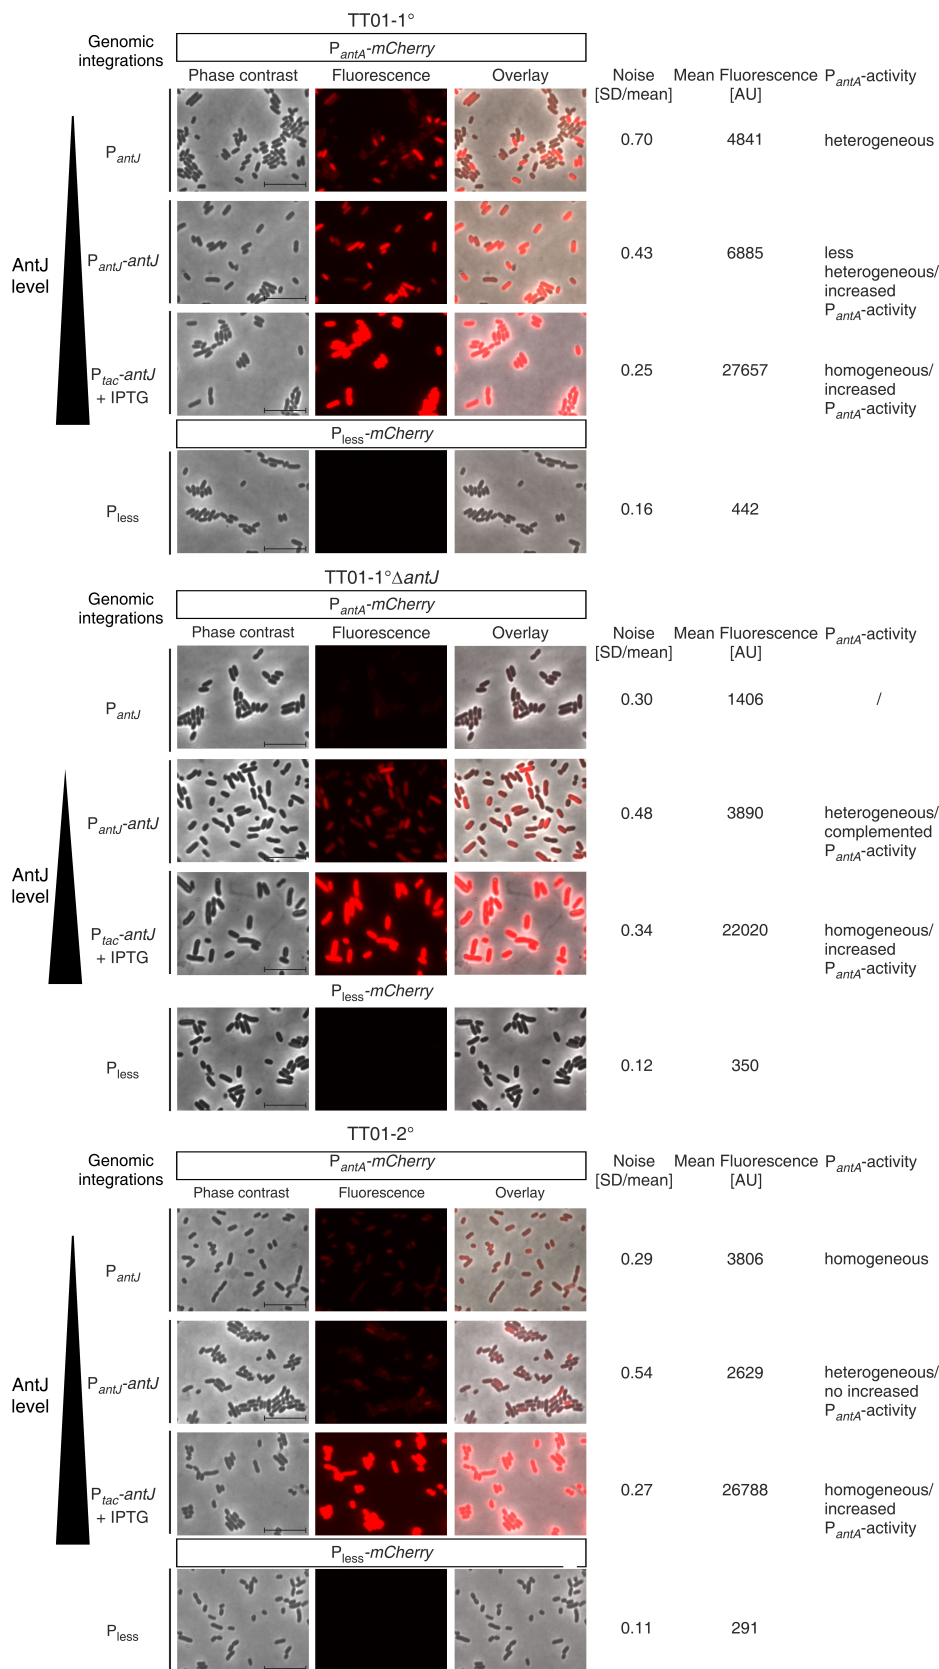

**Figure S8: Single cell microscopy imaging of *P. luminescens* TT01-1°, TT01-1°ΔantJ and TT01-2° cells.** Depicted are the pictures of the phase contrast and the fluorophore

channel as well as the respective overlay picture. The strains harbor  $P_{antA}$ -*mCherry* integrated at the *rpmE/glmS* site. A negative control without a promoter upstream of *mCherry* serves as negative control. The bars indicate a scale of 10  $\mu\text{m}$ . The fluorescence intensities of 450 single cells were individually measured for each experiment and analyzed using the software Big Cell Brother [11]. The noise values were calculated as  $\text{SD}/\text{mean}$  from 450 cells. Representative images and values from one of three independently performed experiments are shown. AU= arbitrary units.

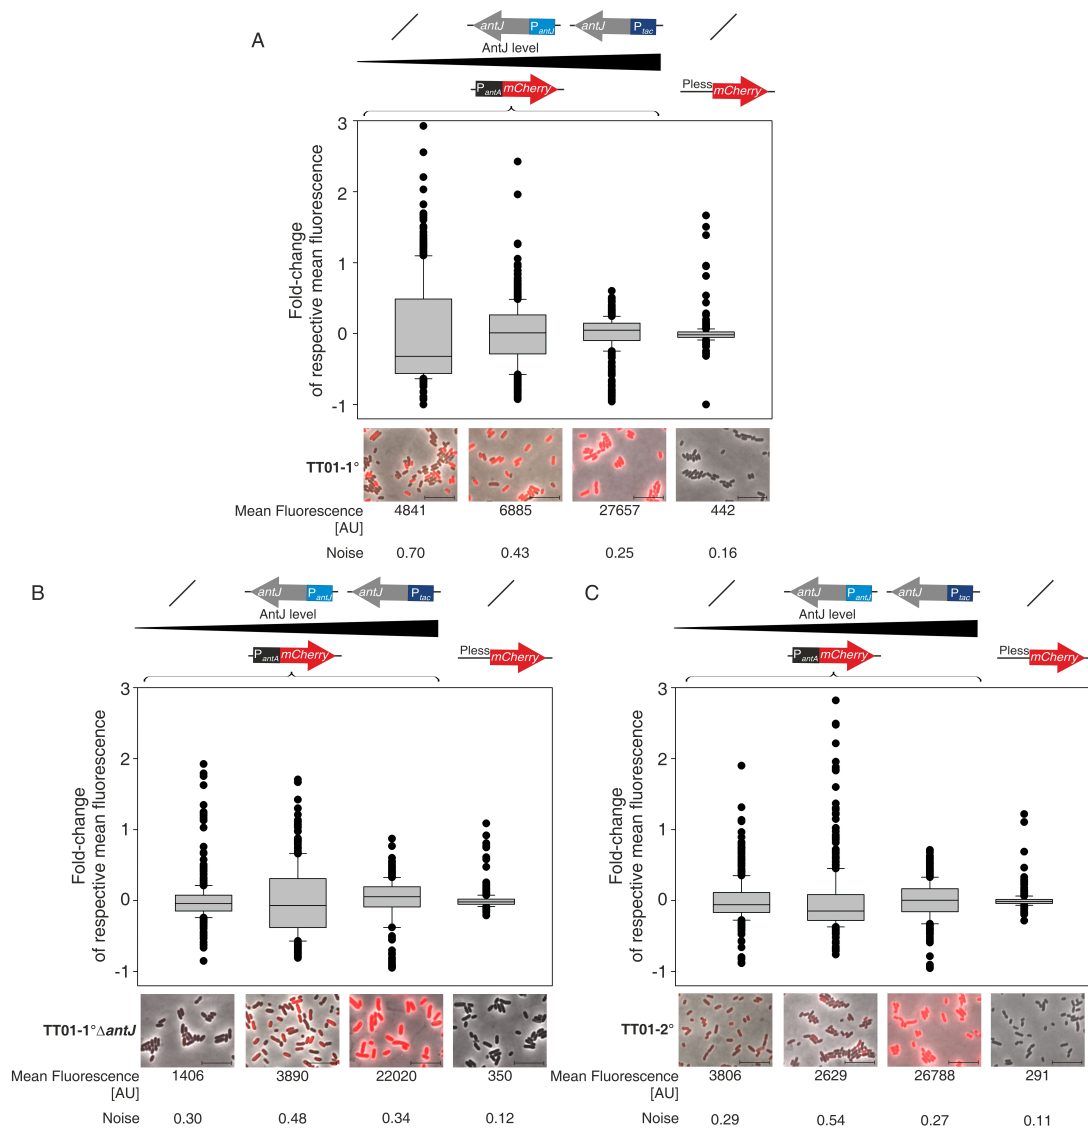

**Figure S9: Degree of heterogeneity of  $P_{antA}$  activity in *P. luminescens* TT01-1°, TT01-1° $\Delta antJ$  and TT01-2° with different levels of AntJ.** The fluorescence intensities of 450 single cells were individually measured for each experiment and analyzed using the software Big Cell Brother [11]. The noise values were calculated as SD/mean from 450 cells. The box plots represent the fold change in the mean fluorescence of the respective reporter strain. Thereby, the fluorescence value of each cell was compared to the mean fluorescence value of 450 cells of the respective reporter strain. Representative images and box plots from one of three independently performed experiments are shown. AU: arbitrary units.

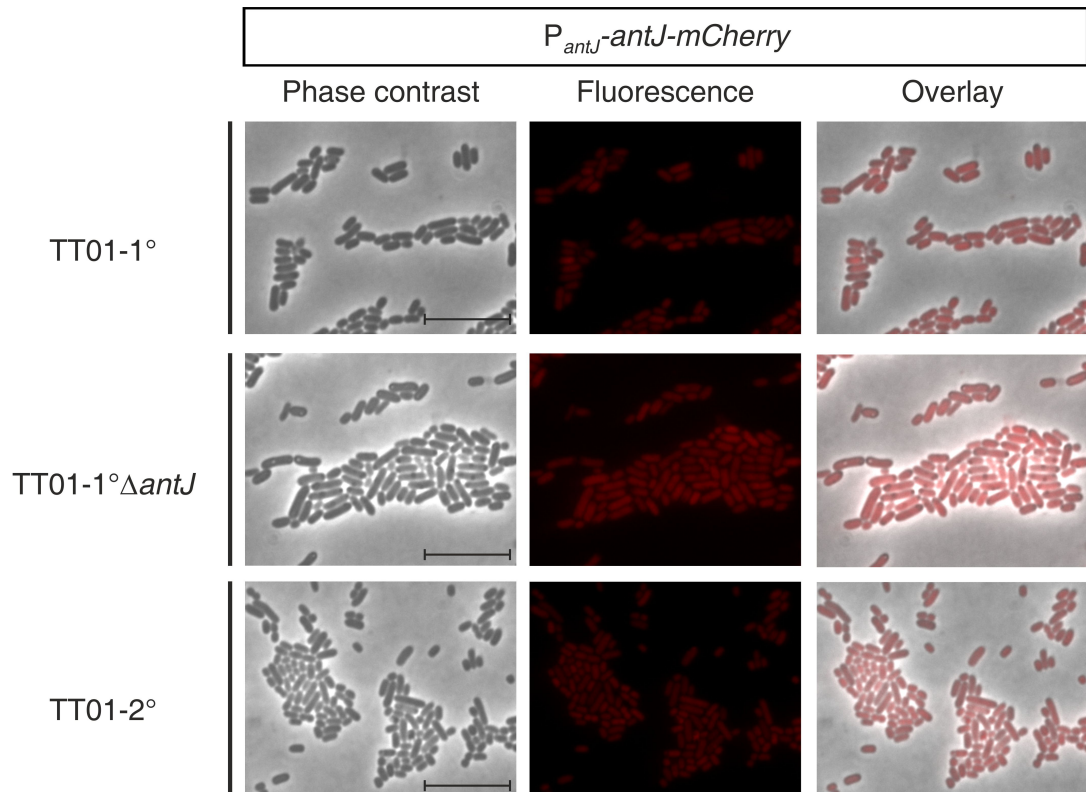

**Figure S10: Single cell microscopy imaging of *P. luminescens* TT01-1°, TT01-1° $\Delta antJ$  and TT01-2° cells with chromosomally integrated  $P_{antJ}\text{-}antJ\text{-}mCherry$ .** Depicted are the pictures of the phase contrast and the fluorophore channel as well as the respective overlay picture. All strains harbor  $P_{antJ}\text{-}antJ\text{-}mCherry$  integrated at the *rpmE/glmS* site. Representative images from one of three independently performed experiments are shown. The bars indicate a scale of 10  $\mu\text{m}$ .



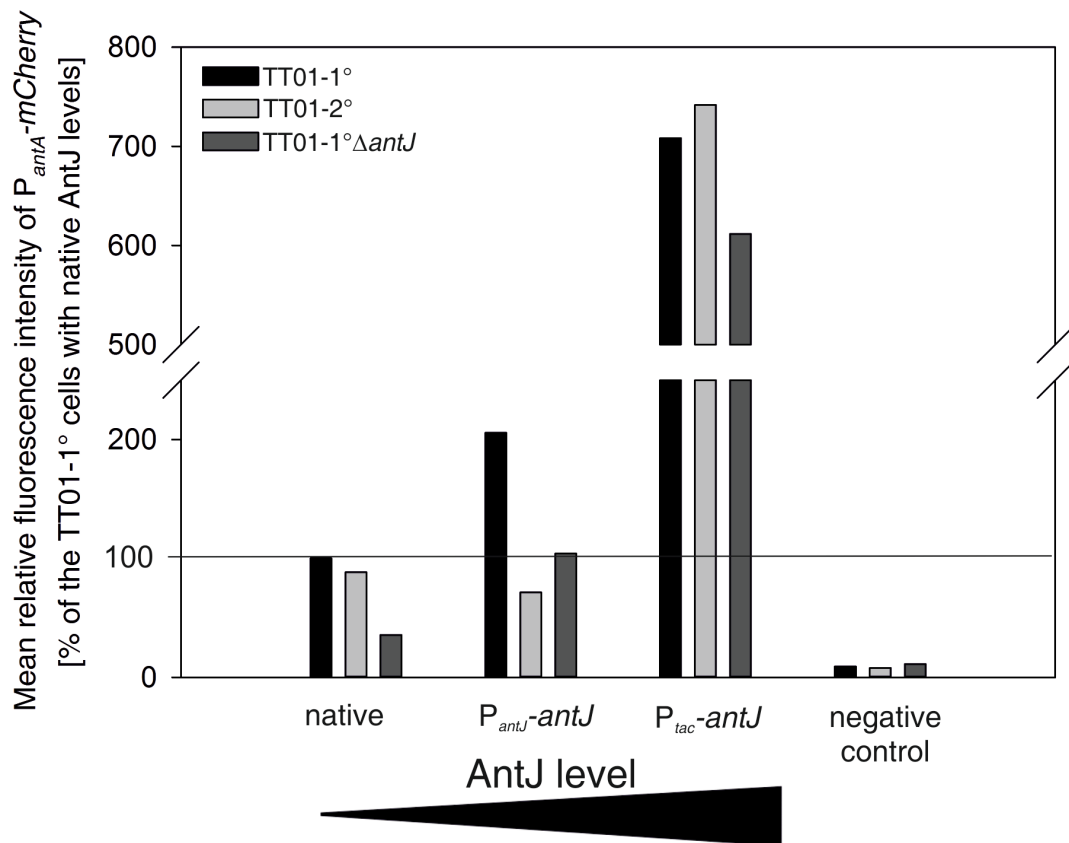

**Figure S11: Influence of the AntJ levels on the mean promoter activity of *antA* in TT01-1°, TT01-2° and TT01-1° $\Delta antJ$  populations.** The mean relative fluorescence values of  $P_{antA}$ -*mCherry* of 1350 individual cells were calculated. Then the  $P_{antA}$  activity in the TT01-1° cells under native conditions were set as 100%, marked via the horizontal black line. The mean  $P_{antA}$ -*mCherry* values of the strains TT01-1°, TT01-2° and TT01-1° $\Delta antJ$  with native levels of AntJ, one additional copy of *antJ* under control of its own promoter or with a strong *tac* promoter were set into relation with TT01-1° cells under native conditions given in percentage. The negative control contains a promoter-less chromosomal *mCherry* integration.

## References

- [1] T. Durfee, R. Nelson, S. Baldwin, G. Plunkett, V. Burland, B. Mau, et al., The complete genome sequence of *Escherichia coli* DH10B: insights into the biology of a laboratory workhorse, *J. Bacteriol.* 190 (2008) 2597–2606. doi:10.1128/JB.01695-07.
- [2] D.M. Woodcock, P.J. Crowther, J. Doherty, S. Jefferson, E. DeCruz, M. Noyer-Weidner, et al., Quantitative evaluation of *Escherichia coli* host strains for tolerance to cytosine methylation in plasmid and phage recombinants, *Nucleic Acids Res.* 17 (1989) 3469–3478.
- [3] S. Thoma, M. Schobert, An improved *Escherichia coli* donor strain for diparental mating, *FEMS Microbiol. Lett.* 294 (2009) 127–132. doi:10.1111/j.1574-6968.2009.01556.x.
- [4] L.M.L. Guzman, D.D. Belin, M.J.M. Carson, J.J. Beckwith, Tight regulation, modulation, and high-level expression by vectors containing the arabinose P<sub>BAD</sub> promoter, *J. Bacteriol.* 177 (1995) 4121–4130.
- [5] E. Duchaud, C. Rusniok, L. Frangeul, C. Buchrieser, A. Givaudan, S. Taourit, et al., The genome sequence of the entomopathogenic bacterium *Photorhabdus luminescens*, *Nat. Biotechnol.* 21 (2003) 1307–1313. doi:10.1038/nbt886.
- [6] A. Glaeser, R. Heermann, A novel tool for stable genomic reporter gene integration to analyze heterogeneity in *Photorhabdus luminescens* at the single-cell level, *Biotech.* 59 (2015) 74–81. doi:10.2144/000114317.
- [7] F.I. Nollmann, A.K. Heinrich, A.O. Brachmann, C. Morisseau, K. Mukherjee, Á.M. Casanova-Torres, et al., A *Photorhabdus* natural product inhibits insect juvenile hormone epoxide hydrolase, *ChemBioChem.* 16 (2015) 766–771. doi:10.1002/cbic.201402650.
- [8] W. Lorenzen, T. Ahrendt, K.A.J. Bozhüyük, H.B. Bode, A multifunctional enzyme is involved in bacterial ether lipid biosynthesis, *Nature Publishing Group.* 10 (2014) 425–427. doi:10.1038/nchembio.1526.
- [9] J. Gödeke, M. Heun, S. Bubendorfer, K. Paul, K.M. Thormann, Roles of Two *Shewanella oneidensis* MR-1 Extracellular Endonucleases, *App. Env. Microbiol.* 77 (2011) 5342–5351. doi:10.1128/AEM.00643-11.
- [10] R. Heermann, T.M. Fuchs, Comparative analysis of the *Photorhabdus luminescens* and the *Yersinia enterocolitica* genomes: uncovering candidate genes involved in insect pathogenicity, *BMC Genomics.* 9 (2008) 40. doi:10.1186/1471-2164-9-40.
- [11] L. Plener, N. Lorenz, M. Reiger, T. Ramalho, U. Gerland, K. Jung, The Phosphorylation Flow of the *Vibrio harveyi* Quorum-Sensing Cascade Determines Levels of Phenotypic Heterogeneity in the Population, *J. Bacteriol.* 197 (2015) 1747–1756. doi:10.1128/JB.02544-14.
